# Supplementary material
Source: publisher site journal article supplement (https://www.dovepress.com/article/254409)
Supplement: Supplementary file 1 [file get_supplementary_file.php]

Annex 1: IDIs and FGDs Guides

## 1) In-depth Interview (IDIs) guide and consent form for PHCU HEWs supervisors and district HEP Coordinators

**Consent Form**

Hello, my name is _____________________________. I work for an organization named Hawassa University College of Medicine and Health Science. I’m here to collect information for the research conducted on the role of HEWs in provision and utilization of CBNC. Thus we would like to hear your opinion on a community’s health seeking behavior, acceptance; and your knowledge and practices towards these services, and the role of HEWs in services provision.

Participation is based on your willingness besides; you can withdraw from the study anytime.

However, your kind participation would mean a lot. In addition, no personal identification will be written and we assure you that whatever information you are providing will only be used for the research purpose and the data will be handled only by the research team.

While we are collecting the data, it is difficult to jot down everything thus we will use a tape record to record our discussion.

Are you willing to participate in the study?

Agreed __________

Not Agreed ____________

Thank you

Name Data collector ___________________ signature ______________________

Date of data collection _____________

Name of Supervisor: _________________ Signature _______________

**In-depth Interview (IDIs)** **guide for HEWs Supervisors and HEP coordinators on utilization of CBNC**

**Age of KII______________ in years**

1. Based on the services HEWs provided to the community, how do you see:
   1. The acceptance of ANC in general by women in this community?
   2. The acceptance of the PNC / Home visits in general by women in this community?
   3. The acceptance of Home-Based Neonatal Health Care in general by women in the community?
2. Do you feel ANC, delivery, PNC/home visits and Home-Based Neonatal Health Care provision by HEWs to mothers and baby is difficult?
   If so why and why not? Ask interims of what…
3. From the services provided by HEWs, what do you think is the attitude/or misconceptions of women and the community in general and women in particular towards:
   1. ANC services
   2. Delivery services
   3. PNC/home visits services
   4. Home Based Neonatal health care services
4. Are there people who are against the following services provided by HEWs in the community? Why?
   1. ANC services
   2. Delivery services
   3. PNC services
   4. Home Based Neonatal health care services
5. What do you think about the performance of HEWs regarding? -
   1. FOCUSED antenatal care, pregnancy registration and follow up by HEWs,
   2. Skilled care at birth,
   3. Early identification and referral of obstetric complications (ask for some of these complications)
   4. Postpartum care for babies; early identification of neonatal illnesses, treatment and referral
   5. Promotion of early initiation of exclusive breastfeeding
   6. Extra care of preterm and low birth weight baby including Kangaroo mother care
6. In your opinion do HEWs know the Strategies to Implement Community Based Newborn Care? probe:
   1. Identify pregnant women
   2. Focused antenatal care (ANC)
   3. Labor and Delivery
   4. Postnatal Care (PNC)
   5. Identify and manage sick newborns at Community level
7. In your opinion, do HEWs know/perform about Labor and Delivery at Community/Household level they are providing?

**Probe on:-**

- 1. Activating birth plan,
  2. Notification of labor based on the birth plan by HEWs.
  3. Mobilizing Support: This may include transportation arrangements, communication with health worker,
  4. Clean and Safe Birth at Home/Health Post Assisted by HEWs,
  5. immediate essential newborn care,
  6. appropriate thermal and cord care,
  7. Resuscitation with bag or ambubag.

1. In your opinion, do HEWs conduct Postnatal Care? (Probe for postnatal home visits on day 1, 3, and 7 for all newborns and those with special needs should also be visited on the 15th day. The 6th week postpartum). If no, why?

- What challenges do HEWs face to ensure every mother and newborn in their respective kebeles receive quality postnatal care services?

1. How do you rate the identification and management of sick newborns at community level by HEWs? If no why?
   1. Identification of sick newborns (mention common causes of neonatal illnesses)
   2. Treatment of sick newborns (how do you treat sick newborns? identify danger signs and treat severe bacterial infections in neonates with antibiotics when referral is not possible. Ask about referral and support link between health posts and health centers for both forward and backward referral.
   3. What are the challenges to ensure every sick newborn baby identified and treated by HEWs?
2. What kinds of activities are being implemented by HEWs to increase uptake and quality of ANC, Skilled delivery, PNC and home-based neonatal health care services provided by them to mothers at home or health posts?
3. What do you think are the challenges to increase uptake and quality of ANC, Skilled delivery, PNC and home-based neonatal health care services provided by HEWs to mothers?
4. What best practices are around to increase uptake and quality of ANC, Skilled delivery, PNC and neonatal health care services provided by HEWs to mothers in the community?
5. What are the positive factors at the community, health post, woreda; zonal or regional levels that facilitate motivate or support HEWs to perform well?
6. What are the barriers at the community, HP, woreda, zonal or regional level that negatively affect performance of HEWs?
7. Any additional thought and comments?

**IDIs Guide**

**QUALITATIVE PART**

## 2) In-depth Interview (IDIs) guide and consent form for HEWs

**Consent Form**

Hello, my name is _____________________________. I work for an organization named Hawassa University College of Medicine and Health Science. I’m here to collect information for the research conducted on the role of HEWs in utilization of CBNC. Thus we would like to hear your opinion on a community’s health seeking behavior, acceptance; and your knowledge and practices towards these services.

Participation is based on your willingness besides; you can withdraw from the study anytime.

However, your kind participation would mean a lot. In addition, no personal identification will be written and we assure you that whatever information you are providing will only be used for the research purpose and the data will be handled only by the research team.

While we are collecting the data, it is difficult to jot down everything thus we will use a tape record to record our discussion.

Are you willing to participate in the study?

Agreed __________

Not Agreed ____________

Thank you

Name Data collector ___________________ signature ______________________

Date of data collection _____________

Name of Supervisor: _________________ Signature _______________

In-depth interview guide for HEWs on utilization of CBNC

Age of HEW______________ in years

1. Based on the services you provided to the community, How do you see:
   1. The acceptance of ANC in general by women in this community?
   2. The acceptance of the PNC / Home visits in general by women in this community?
   3. The acceptance of **Home Based** Neonatal Health Care in general by women in the community?
2. Do you feel **ANC, delivery, PNC/home visits** and **Home Based** Neonatal Health Care provision by you (HEWs) to mothers and baby is difficult?
   If so why and why not? Ask interims of what…
3. From the services provided by HEWs/you, what do you think is the attitude of women and the community in general and women in particular towards:
   1. ANC services
   2. Delivery services
   3. PNC/home visits services
   4. Home Based Neonatal health care services
4. Are there people who are against the following services provided by HEWs in the community? Why?
   1. ANC services
   2. Delivery services
   3. PNC services
   4. Home Based Neonatal health care services
5. Are there misconceptions among community/mothers about ANC, skilled delivery, PNC and home based neonatal health care services provided by HEWs?
   1. What are the misconceptions?
   2. What are the sources of these misconceptions?
6. What do know about maternal health? Probe for each of the following:
   1. FOCUSED antenatal care, pregnancy registration and follow up by HEWs,
   2. Skilled care at birth,
   3. Early identification and referral of obstetric complications (ask for some of these complications)
   4. Postpartum care for babies; early identification neonatal illnesses, treatment and referral
   5. Promotion of early initiation of exclusive breastfeeding
   6. Extra care of preterm and low birth weight baby including Kangaroo mother care
7. Do you know the Strategies to Implement Community Based Newborn Care? probe:
8. Identify pregnant women
9. Focused antenatal care (ANC)
10. Labor and Delivery
11. Postnatal Care (PNC)
12. Identify and manage sick newborns at Community level
13. What are components of Focused Antenatal Care (FANC) and how do you practice them? (Do not read them but Probe on) :
14. Four antenatal visits (if no complications)
15. Counseling on birth preparedness
16. HIV counseling and testing
17. Counseling for FP, and nutrition
18. Treatment of diagnosed STI
19. Tetanus toxoid (2 doses)
20. Iron and folate supplement
21. Detection and management of complications
22. Discuss about Labor and Delivery at Community/Household level you are providing

**Probe on:**

- 1. Activating birth plan,
  2. Notification of labor based on the birth plan by HEWs.
  3. Mobilizing Support: This may include transportation arrangements, communication with health worker,
  4. Clean and Safe Birth at Home/Health Post Assisted by HEWs,
  5. immediate essential newborn care,
  6. appropriate thermal and cord care,
  7. Resuscitation with bag or ambubag.
  8. Which baby can receive routine care after birth? ask the HEWs to mention danger signs like A baby is quiet, limp and not breathing at birth; A baby is born through meconium-stained amniotic ﬂuid; A newborn baby is quiet, limp and not crying; A baby’s chest is not moving with bag and mask ventilation.

1. How do you conduct Postnatal Care? (Probe for postnatal home visits on day 1, 3, and 7 for all newborns and those with special needs should also be visited on the 15th day. The 6th week postpartum)
2. How do you Identify and manage sick newborns at community level?
   1. Identification of sick newborns(mention common causes of neonatal illnesses)
   2. Treatment of sick newborns (how do you treat sick newborns? identify danger signs and treat severe bacterial infections in neonates with antibiotics when referral is not possible. Ask about referral and support link between health posts and health centers for both forward and backward referral.
3. What kinds of activities are being implemented by you/HEW to increase uptake and quality of ANC, Skilled delivery, PNC and home based neonatal health care services provided by you to mothers at home or health posts?
4. What do you think are the challenges to increase uptake, and quality of ANC, Skilled delivery, PNC and home based neonatal health care services provided by HEWs to mothers?
5. What best practices/positive factors are around to increase uptake and quality of ANC, Skilled delivery, PNC and neonatal health care services provided by HEWs to mothers in the community?
6. What are the barriers at the community, HP, woreda, zonal or regional level that negatively affect performance of HEWs? Why and why not?
7. Any additional thought?

**FGDs for Mothers**

## 3) Question-Guide and consent form of FGDs on Role of HEWs in Improving Newborn health

The moderator should make the effort to interact with the participants briefly outside of the discussion room before the focus group discussion takes place.

I. INTRODUCTION

Good morning/afternoon and thank you all for coming. My name is _______ and this is my colleague _____. Working for Hawassa University College of Medicine and Health Science, ------- We are conducting several meetings with people like you to find out how you feel about several health issues. We will be talking to groups of men and women. Your opinions are very important, and will help us improve the kind of services that are provided. Please tell us your feelings and ideas about the topics that come up in today's talk.

There is no right or wrong answers, and you do not have to agree with what someone else says. Everyone's contribution is valuable. We want this to be a group discussion; so don't wait for me to call on you. Just speak up. Speak up one at a time so we all can hear.

Your answers will remain confidential and anonymous. Your answers will help us plan programs for your area.

So that we do not lose any important information, we would like to tape-record the discussion. Is that all right with everyone? You may listen to the discussion at the end if you wish.

Note to the moderator: Moderators should pay attention to the mood of the group, and ask questions about respondents' personal opinions and practices as much as possible with phrases like “How about you?"

II. ICE-BREAKER EXERCISE

Conduct round-table introductions. Request each participant to take a few minutes to talk with the person on his left. He should find out all they can about that person--where he lives, how he spends his time in the village and what his interests are. Give participants 2 or 3 minutes to talk with their neighbors. Then ask each participant to introduce his neighbor to the group

Are you willing to participate in the study?

Agreed __________; Not Agreed ____________

Name Data collectors 1. ___________________ Signature ______________________

2. ___________________ Signature ____________________

Date of data collection _____________

Name of Supervisor: _________________ Signature _______________

1. What do you think are the common health problems of mothers and newborn babies?
2. In your opinion, do HEWs conduct:

- ANC,
- skilled delivery,
- home visits for PNC, and
- Home visits for Home Based Neonatal What do you think are the common health problems of mothers and newborn babies health care services to your community?
   If so, why? Why not?

1. Do you feel:

- ANC,
- skilled delivery,
- home visits for PNC, and
- Home visits for Home Based Neonatal health care services provided by HEWs to mothers and **baby is necessary** to your community?
   If so, why? Why not?

1. Do you feel:
2. ANC,
3. skilled delivery,
4. home visits for PNC, and
5. Home visits for Home Based Neonatal health care services provided by HEWs to mothers and **baby is acceptable** by your community?

If so, why? Why not?

1. Do you or your community **satisfied** with:
2. ANC,
3. skilled delivery,
4. Home visits for PNC and
5. Home visits for Home Based Neonatal health care services provided by HEWs to mothers and baby?
6. If no, why? -ask interims lack of knowledge, skill, experience, respect etc. of HEWs
7. Do you think there are people who **oppose?**
8. ANC?
9. Skilled delivery?
10. Home visits for PNC and
11. Home visits for Home Based Neonatal health care services provided by HEWs to mothers and baby?
    If yes, who do you think these people are in terms of educational, marital and economic status?
12. Sometimes a community might have misconceptions about ANC, skilled delivery, Home visits for PNC and Home-Based Neonatal health care services provided by HEWs to mothers and baby. Does this exist in your community?

a. What are the misconceptions?
b. What are the sources of these misconceptions?

1. What do you think are the challenges to?
2. ANC,
3. skilled delivery,
4. Home visits for PNC and
5. Home visits for Home Based Neonatal health care services provided by HEWs to mothers and baby?
6. What do you think need to be done to increase uptake of?
7. ANC,
8. skilled delivery,
9. Home visits for PNC and
10. Home visits for Home Based Neonatal health care services provided HEWs to mothers and baby?
11. What do you think need to be done to improve quality of?
12. ANC,
13. skilled delivery,
14. Home visits for PNC and
15. Home visits for Home Based Neonatal health care services provided by HEWs to mothers and baby?
16. What are the positive factors at the community levels that facilitate motivate or support HEWs to perform well?
17. What are the barriers at the community level that negatively affect performance of HEWs?

Any additional thought?
